# Supplementary material
Source: MDPI journal article supplement (https://www.mdpi.com/1424-8247/15/8/971)
Supplement: s1 [file s1]

# The Effect of Various Poly(N-vinylpyrrolidone) (PVP) Polymers on the Crystallization of Flutamide

Dawid Heczko,<sup>1,\*</sup> Barbara Hachuła,<sup>2</sup> Paulina Maksym,<sup>3</sup> Kamil Kamiński,<sup>4</sup> Andrzej Zięba,<sup>5</sup>  
Luiza Orszulak,<sup>2</sup> Marian Paluch,<sup>4</sup> Ewa Kaminska<sup>1,\*</sup>

<sup>1</sup> Department of Pharmacognosy and Phytochemistry, Faculty of Pharmaceutical Sciences in Sosnowiec, Medical University of Silesia in Katowice, 41-200 Sosnowiec, Poland

<sup>2</sup> Institute of Chemistry, Faculty of Science and Technology, University of Silesia in Katowice, 40-007 Katowice, Poland

<sup>3</sup> Institute of Material Science, Faculty of Science and Technology, University of Silesia in Katowice, 41-500 Chorzów, Poland

<sup>4</sup> Institute of Physics, Faculty of Science and Technology, University of Silesia in Katowice, 41-500 Chorzów, Poland

<sup>5</sup> Department of Organic Chemistry, Faculty of Pharmaceutical Sciences in Sosnowiec, Medical University of Silesia in Katowice, 41-200 Sosnowiec, Poland

\* Corresponding authors: D.H. (dawid.heczko@sum.edu.pl), E.K. (ekaminska@sum.edu.pl)

## Supplementary Materials

### Synthesis procedures

PVP has been produced *via* high-pressure (HP) thermally-initiated free-radical polymerization (FRP) according to the procedure previously reported by some of us (0.01-0.15 wt% of AIBN) [1]. In this work, a similar methodology (0.5 wt% of AIBN) was used for PVP-OH except that 2-isopropoxyethanol (100 wt% in respect to monomer) was added to act as a solvent and a chain transfer agent. The polymerization process was conducted at  $p=250$  MPa,  $T=60$  °C within 3h (see Scheme S1). PVP-OH sample was purified by vacuum evaporation, followed by chloroform dissolution and precipitation in cold diethyl ether. Purification using a chloroform-diethyl ether solvent system was repeated four times. The resulting precipitate was collected by filtration and dried over vacuum to a constant mass.

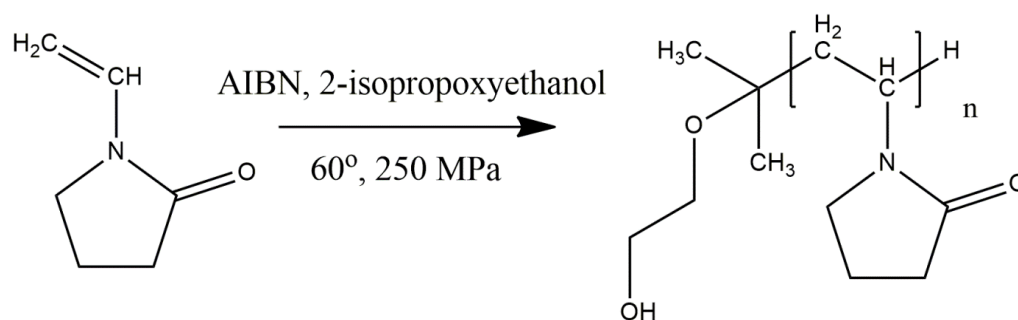

**Scheme S1.** Synthetic pathway for the production of PVP-OH.

### ***NMR analysis***

The PVP-OH structure has been confirmed by  $^1\text{H}$  and  $^{13}\text{C}$  NMR analysis ( $\sim 40$  mg in 0.8 mL deuterium oxide). VP conversion was calculated from  $^1\text{H}$  NMR spectrum ( $\text{CDCl}_3$ ) registered for the sample taken from the reaction mixture by comparing the integral areas of the protons of the VP (1H,  $\delta=7.11$  ppm) in reference to the methylene protons peaks adjusting to the lactam ring of both VP and PVP (8H,  $\delta=1.85$ -2.55 ppm). As demonstrated in Figure S1a ( $^1\text{H}$  NMR,  $\text{D}_2\text{O}$ ), despite the signals assigned to PVP that is  $\delta=1.42$ -1.84 (2H,  $-\text{CH}_2\text{-CH-}$ , the main chain);  $\delta=1.80$ -2.08 (2H,  $-\text{CH}_2\text{-CH}_2\text{-CH}_2-$ ); 2.10-2.52 (2H,  $-\text{CH}_2\text{-C=O}$ ); 3.42-3.90 (1H,  $-\text{CH}_2\text{-CH-}$ , the main chain); 2.90-3.40 (2H,  $-\text{CH}_2\text{-N-}$ ), also the hydroxyl-chain-end –  $\text{CH}_2\text{OH}$  signal at  $\delta=2.56$  can be visible. Referring, in turn, to the  $^{13}\text{C}$  NMR analysis (see Figure S2a among the signals characteristic for PVP, that is  $\delta=179.5$  ppm ( $\text{C=O}$ ),  $\delta=42.5$ -48.5 ppm ( $\text{CH}_2\text{-CH-}$ , the main chain),  $\delta=33.9$ -37.7 ppm ( $-\text{CH}_2\text{-CH-}$ , the main chain),  $\delta=31.8$ -32.9 ppm ( $\text{O=C-CH}_2\text{-CH}_2\text{-CH}_2\text{-N-}$ ),  $\delta=19.2$  ppm ( $-\text{CH}_2\text{-CH}_2\text{-CH}_2-$ ), a weak signal at 62.02 ppm assigned to hydroxyl-chain-end has appeared ( $\text{CH}_2\text{OH}$ ). Moreover, it should be added that commercial PVPs can also be terminated with the hydroxyl group due to the presence of the water as a polymerizing medium and  $\text{H}_2\text{O}_2$  initiator. This situation was observed, for example, in commercial PVP  $M_n=10.0$  kg/mol [2]. Notably, this peak has not been visible in both the  $^1\text{H}$  and  $^{13}\text{C}$  NMR spectra of the commercial PVP K90, see Figure S1b and Figure S2b, respectively. We previously reported a similar result for the self-synthesized PVP in bulk [1].

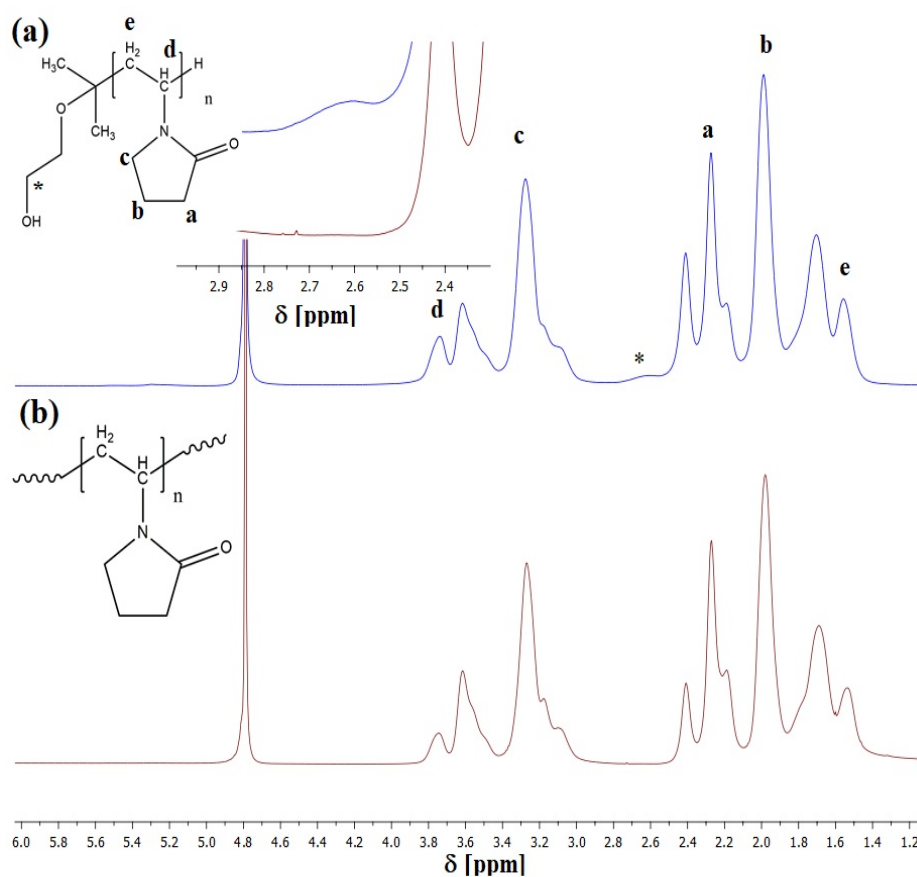

**Figure S1.**  $^1\text{H}$  NMR spectra ( $\text{D}_2\text{O}$ ) of (a) self-synthesized PVP-OH, and (b) commercial PVP K90.

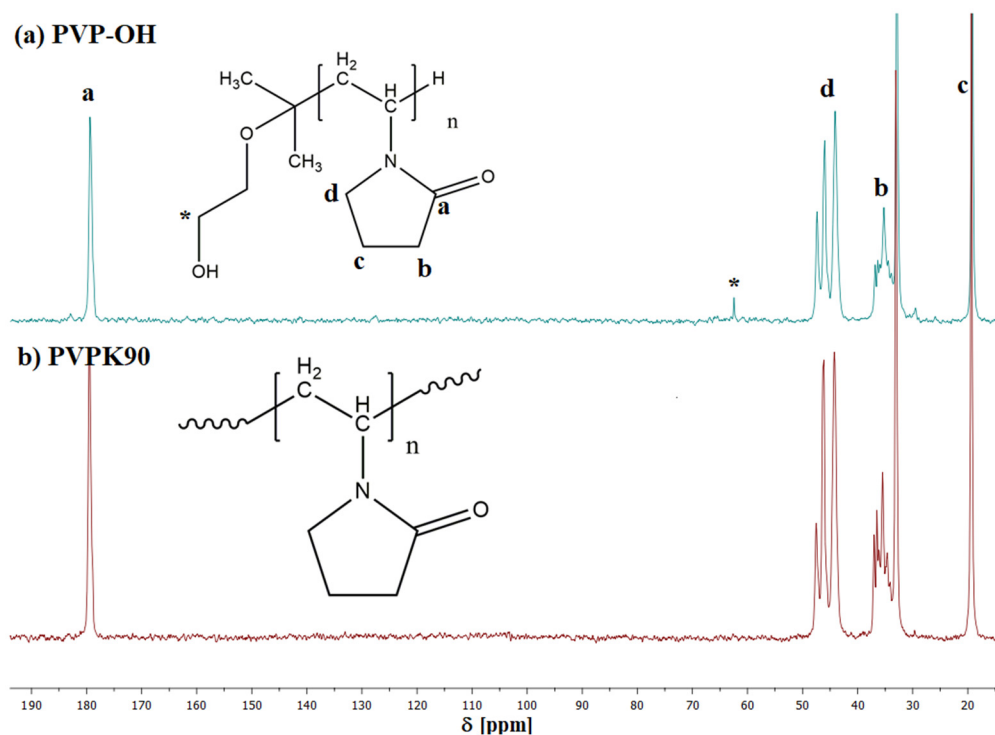

**Figure S2.**  $^{13}\text{C}$  NMR spectra ( $\text{D}_2\text{O}$ ) of (a) self-synthesized PVP-OH, and (b) commercial PVP K90.

The PVP microstructure (tacticity) has been evaluated from the <sup>13</sup>C NMR analysis performed in D<sub>2</sub>O. According to previous reports, the intensities of the different peaks were determined by peak deconvolution [3,4]. Note that D<sub>2</sub>O solvent was applied due to more clearly separated signals than those visible in CDCl<sub>3</sub>. The expanded carbonyl region allowed us to determine triad sequences (see Figure 2, main manuscript). In addition, based on the report [4], we thoroughly evaluated tetrad sequences from the β-methylene signals. As shown in Figure S3, the PVP K90 sample is dominated mainly by the r-centred tetrads (mrm, mrr), and such a phenomenon was previously reported for PVP prepared in aqueous solution [5]. In turn, PVP samples synthesized in bulk HP thermally-initiated methodology show similar tetrads sequences (irrespective of their M<sub>n</sub>) on those reported for PVP K90, but with slightly higher content of isotactic fractions. This effect can directly result from the compression of the polymerizing mixture. More interesting, the PVP-OH sample, although prepared in a HP solvent-assistant FRP methodology, is mainly dominated by isotactic fractions with a relatively high content of syndiotactic ones, which, as we assume, can be a result of simultaneous action of both internal and external factors as a polar solvent and high-pressure, respectively.

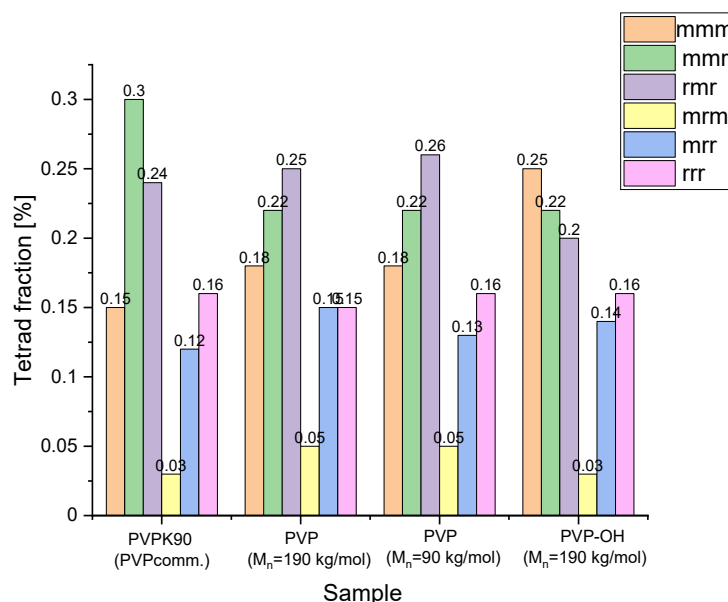

**Figure S3.** The content of tetrad fractions determined from β-methylene protons (<sup>13</sup>C NMR, D<sub>2</sub>O).

## Size exclusion chromatography (SEC) analysis

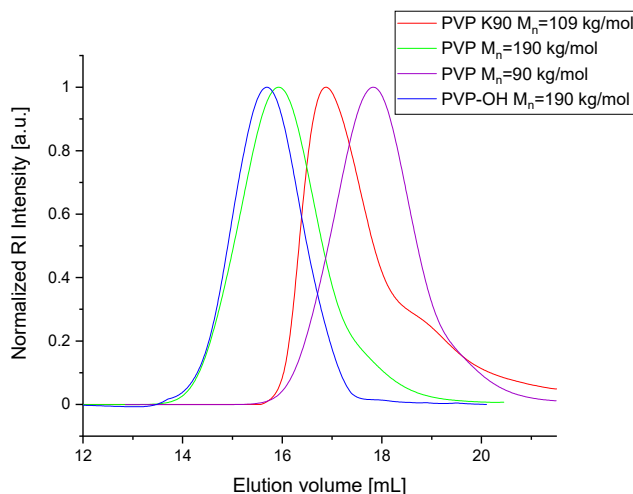

**Figure S4.** SEC traces of different PVPs used as matrices for FL (DMF+ 10mmol LiBr).

As shown in Figure S4, all self-synthesized PVPs obtained by the high-pressure methodology reveal symmetric and monomodal peaks shape demonstrate greater control over the polymerization process concerning the atmospheric pressure methodology. Moreover, in the case of the commercial PVP K90 sample, a high low-molecular-weight tail can be visible, proving the relatively high content of low  $M_n$  fraction in the synthesized sample. Dispersities of PVP K90 ( $M_n=109$  kg/mol), PVP ( $M_n=190$  kg/mol), PVP ( $M_n=90$  kg/mol), and PVP-OH ( $M_n=190$  kg/mol) took values  $\bar{D}=1.78$ ,  $\bar{D}=1.86$ ,  $\bar{D}=1.47$ ,  $\bar{D}=1.63$ , respectively.

## Non-isothermal calorimetric data

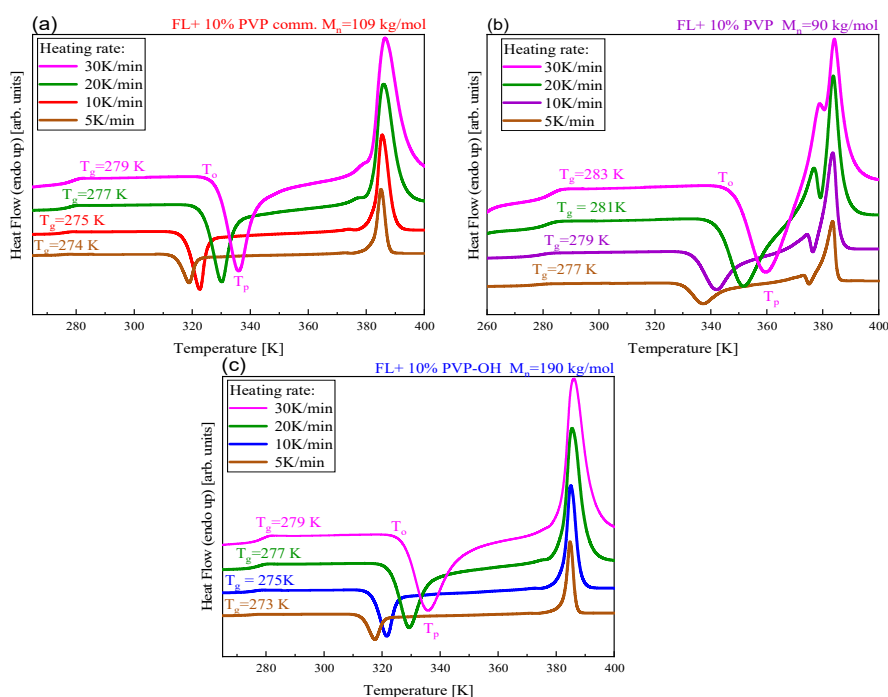

**Figure S5.** DSC curves obtained for binary mixtures of FL with PVPcomm. (a), PVP  $M_n=90$  kg/mol (b) and PVP-OH  $M_n=190$  kg/mol (c). Thermograms were measured with the indicated heating rates.

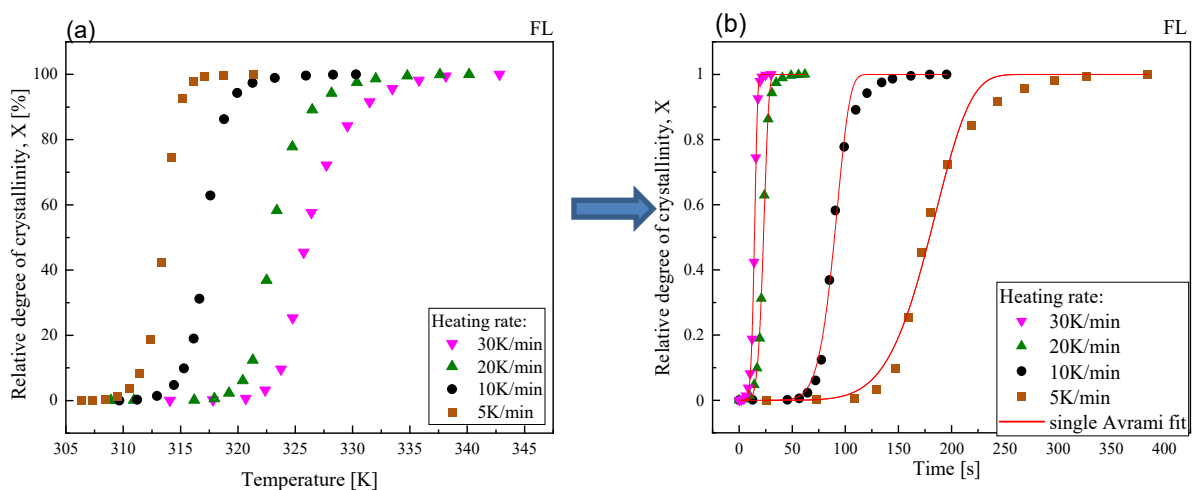

**Figure S6.** The relative degree of crystallinity obtained from Equation (4) at different  $\phi$ , presented as a function of temperature (a). Time dependence of crystallization degree determined by transforming the temperature scale into the time scale using Equation (5) (b).

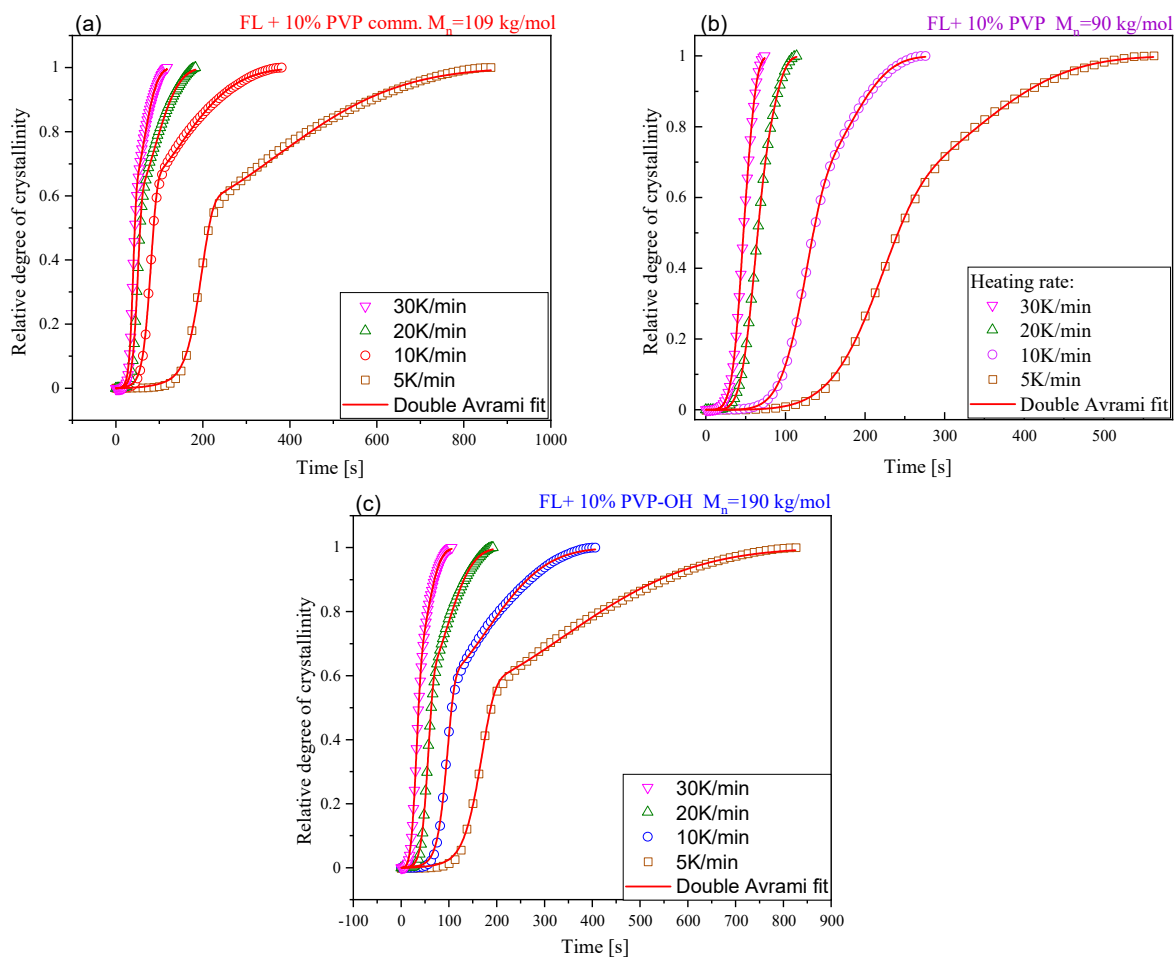

**Figure S7.** The relative degree of crystallinity versus time for binary mixtures of FL with 10 wt% of PVPcomm. (a), PVP  $M_n=90$  kg/mol (b) and PVP-OH  $M_n=190$  kg/mol (c). The solid lines represent double Avrami fits.

## Infrared data

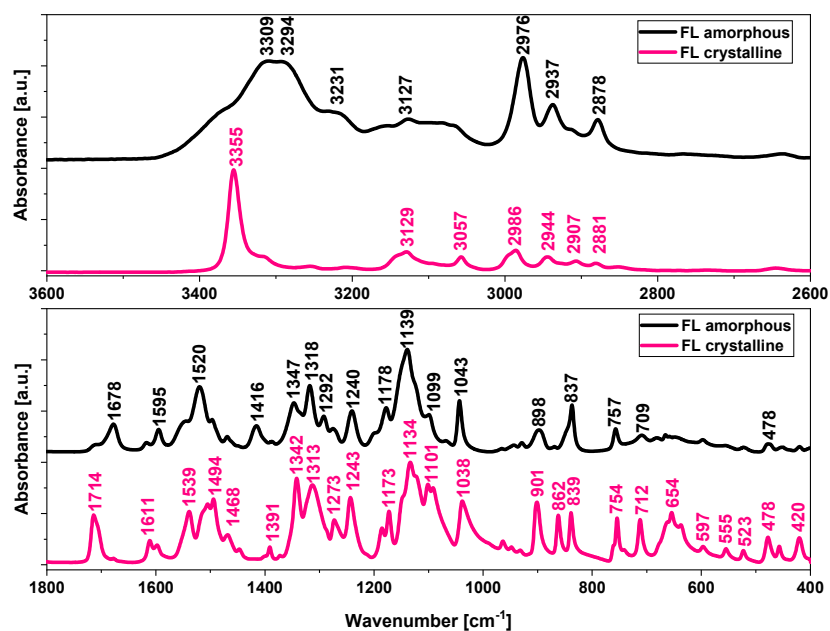

**Figure S8.** ATR-FTIR spectra of amorphous (red) and crystalline (black) FL samples presented in the high- and low-frequency ranges ( $3600\text{--}2600\text{ cm}^{-1}$  and  $1800\text{--}400\text{ cm}^{-1}$ , respectively).

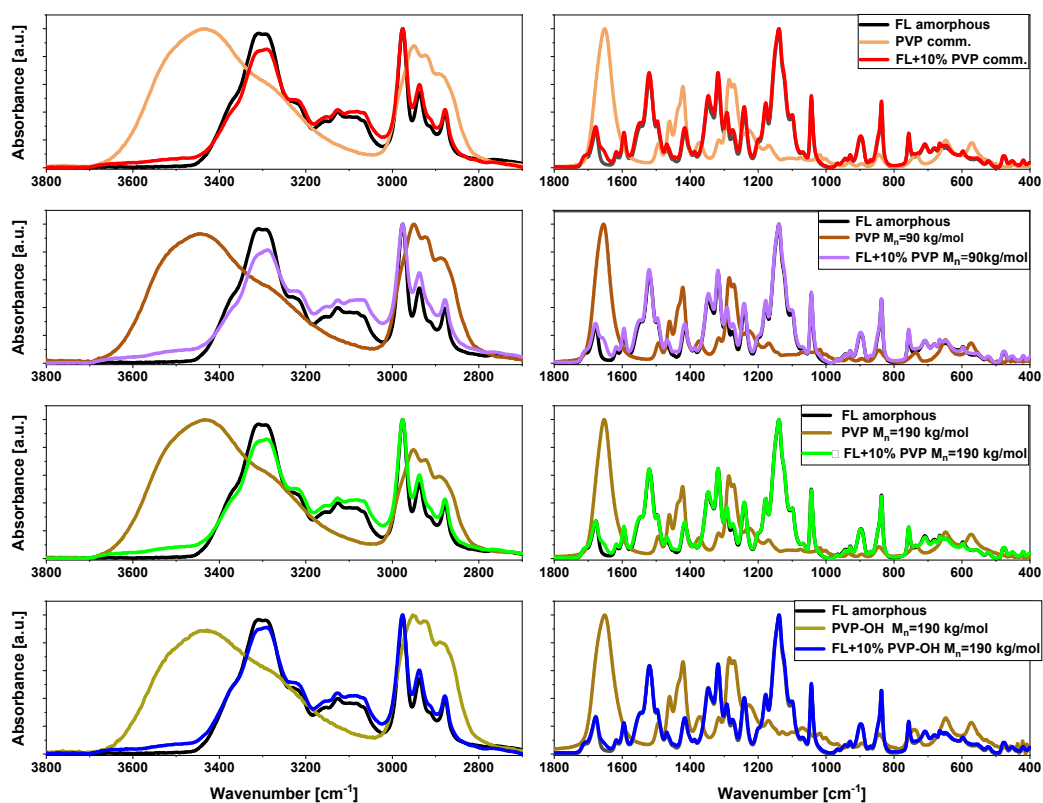

**Figure S9.** A comparison of the FTIR spectra of neat FL (black), PVP (red) as well as FL-polymer binary mixtures with 10% content of the excipient (blue) at 293K in the high- and low-frequency ranges (left and right, respectively).

## References

---

1. Maksym, P.; Tarnacka, M.; Heczko, D.; Knapik-Kowalczyk, J.; Mielanczyk, A.; Bernat, R.; Garbacz, G.; Kaminski, K.; Paluch, M. Pressure-assisted solvent- and catalyst-free production of well-defined poly(1-vinyl-2-pyrrolidone) for biomedical applications. *RSC Adv.* **2020**, *10*, 21593–2160.
2. Washio, I.; Xiong, Y.; Yin, Y.; Xia, Y. Reduction by the end groups of poly(vinyl pyrrolidone): A new and versatile route to the kinetically controlled synthesis of Ag triangular nanoplates. *Adv. Mater.* **2006**, *18*, 1745–1749.
3. Hirano, T.; Miyamoto, Y.; Amano, S.; Tatsumi, K.; Anmoto, T.; Kimura, H.; Yoshida, K.; Oshimura, M.; Ute, K. Hydrogen-bond-assisted isotactic-specific radical polymerization of *N*-vinyl-2-pyrrolidone with tartrate additives in toluene at low temperatures: high-resolution <sup>1</sup>H NMR analysis. *RSC Adv.* **2014**, *4*, 53079–53089.
4. Dutta, K.; Brar, A.S. Poly(vinylpyrrolidone): Configurational assignments by one- and two-dimensional NMR spectroscopy. *J. Polym. Sci. A Polym. Chem.* **1999**, *37*, 3922–3928.
5. Othmer, K. Encyclopedia of Chemical Technology, John Wiley & Sons, 2001, ISBN: 9780471484943, DOI: 10.1002/0471238961, R.B. Login, N-vinylamide polymers, p. 7.
